# Supplementary material for: Measurement report: Formation of tropospheric brown carbon in a lifting air mass
Source: Copernicus journal article supplement (doi:10.5194/egusphere-2024-891), 2024-04-15
Supplement: Supplementary file 1 [file egusphere-2024-891-supplement.pdf]

1 *Supplementary Information for*

2 **Measurement report: Formation of tropospheric brown carbon in a**  
3 **lifting air mass**

4 Can Wu<sup>1,2</sup>, Xiaodi Liu<sup>1</sup>, Ke Zhang<sup>1</sup>, Si Zhang<sup>1\*</sup>, Cong Cao<sup>3,4</sup>, Jianjun Li<sup>3</sup>, Rui Li<sup>1,2</sup>, Fan  
5 Zhang<sup>1,2</sup>, Gehui Wang<sup>1,2\*</sup>

6  
7  
8  
9  
10  
11 <sup>1</sup>Key Lab of Geographic Information Science of the Ministry of Education, School of  
12 Geographic Sciences, East China Normal University, Shanghai 210062, China

13 <sup>2</sup>Institute of Eco-Chongming, 20 Cuiniao Rd., Chongming, Shanghai 202150, China

14 <sup>3</sup>State Key Laboratory of Loess and Quaternary Geology, Institute of Earth Environment,  
15 Chinese Academy of Sciences, Xi'an 710061, China

16 <sup>4</sup>School of Marine and Atmospheric Science, Stony Brook University, Stony Brook, NY 11794,  
17 USA

18  
19  
20  
21  
22  
23  
24 \*Corresponding authors: Dr. Si Zhang, E-mail: [szhang@geo.ecnu.edu.cn](mailto:szhang@geo.ecnu.edu.cn)  
25 Prof. Gehui Wang, E-mail: [ghwang@geo.ecnu.edu.cn](mailto:ghwang@geo.ecnu.edu.cn)

26  
27  
28  
29  
30  
31  
32  
33 List of supporting materials:

- 34 1. Two text, Text S1- S2.  
35 2. Four tables, Table S1-S4.  
36 3. Nine figures, Figure S1-S10.

38 **Text S1** UV–vis light absorption measurement

39 About 8 punches (12 cm<sup>3</sup>) from each filter sample was extracted three time under sonication  
40 with 15 ml Milli-Q pure water (18.2 MΩ), and the extract was subsequently filtered through  
41 0.45 μm PTFE pore syringe filter to remove the insoluble component in the suspension. A  
42 liquid waveguide capillary UV–vis spectrometer equipped with a 1 m long-effective path  
43 detection cell was applied to record the light absorption spectra of all extracts. The light  
44 absorption spectrum was finally converted into absorption coefficient (abs<sub>λ</sub>, M/m) at a  
45 particular wavelength (λ) using the following equation.

Eq.S1

$$abs_{\lambda} = (A_{\lambda} - A_{700}) \frac{v_1}{v_a \times l} \times \ln(10)$$

46 Where A<sub>λ</sub> and A<sub>700</sub> represent the light absorption of the extracts at wavelength λ and 700 nm,  
47 respectively. V<sub>1</sub> corresponds to the volume of the extract, e.g., 15 ml; V<sub>a</sub> refers to the volume of  
48 the air through corresponding to filter punches; l (m) is the absorbing path length. While, ln(10)  
49 is used for converting common logarithm that provided by the spectrophotometer to natural  
50 logarithm.

51

52 **Text S2** Positive matrix factorization (PMF) source apportionment

53 To quantitatively determine the fractional contribution of specific sources to BrC, a PMF  
54 receptor model (EPA PMF 5.0 version) coupled with a bootstrap technique was applied here,  
55 which has been widely used for the source apportionment of atmospheric pollutants in previous  
56 studies. For more details of this method, you can found on the EPA  
57 website([https://www.epa.gov/air-research/epa-positive-matrix-factorization-50-fundamentals-  
58 and-user-guide](https://www.epa.gov/air-research/epa-positive-matrix-factorization-50-fundamentals-and-user-guide)). Briefly, WSOC, WSON, SO<sub>4</sub><sup>2-</sup>, NH<sub>4</sub><sup>+</sup>, Mg<sup>2+</sup>, Ca<sup>2+</sup>, abs<sub>365 nm</sub> and organic tracers  
59 (BbF, Bghip and levo.) were regarded as the input variables in the present work. As indicated in  
60 our previous study on Mt. Hua(Wu et al., 2022), insignificant change in the corresponding  
61 emission sources was revealed during air mass lifting process. Thus, the daytime samples from  
62 both sites were added together as one data matrix. Considering Q values and interpretability,  
63 four factors were obtained as the optimal solution after numerous testes with three to seven  
64 factors, and the input species matched well with simulated ones with significant correlations  
65 (R<sup>2</sup>>0.88).

66

67

68

69

70

71

72

73

74

75

76  
77  
78  
79

**Table S1** RF model performance for testing dataset.

|                | MF site | MS site |
|----------------|---------|---------|
| R <sup>2</sup> | 0.92    | 0.86    |
| MSE            | 0.003   | 0.008   |
| RMSE           | 0.054   | 0.091   |
| MAE            | 0.04    | 0.07    |

80 Note: MSE: mean square error; RMSE: root-mean-square error; MAE: mean absolute error.

81  
82  
83  
84

85 **Table S2.** Information and mass concentration ( $\mu\text{g m}^{-3}$ ) of nitroaromatic compounds detected in  
86 this study.

| Compounds                | Molecular | Formula                                       | CAS number | Abbreviation | MF site   | MS site     |
|--------------------------|-----------|-----------------------------------------------|------------|--------------|-----------|-------------|
| 4-Nitrophenol            | 139.11    | C <sub>6</sub> H <sub>5</sub> NO <sub>3</sub> | 100-02-7   | 4NP          | 2.6±2.6   | 0.40±0.25   |
| 3-Methoxy-4-nitrophenol  | 153.14    | C <sub>7</sub> H <sub>7</sub> NO <sub>3</sub> | 2581-34-2  | 3M4NP        | 0.07±0.05 | 0.01±0.01   |
| 4-Nitrocatechol          | 155.11    | C <sub>6</sub> H <sub>5</sub> NO <sub>4</sub> | 59030-13-6 | 4NC          | 1.6±2.5   | 0.25±0.67   |
| 4-Methyl-5-nitrocatechol | 169.13    | C <sub>7</sub> H <sub>7</sub> NO <sub>4</sub> | 68906-21-8 | 4M5NC        | 11.4±11.4 | 1.8±1.3     |
| 3-Nitrosalicylic acid    | 183.12    | C <sub>7</sub> H <sub>5</sub> NO <sub>5</sub> | 85038-1    | 3NSA         | 0.01±0.01 | 0.004±0.01  |
| 5-Nitrosalicylic acid    | 183.12    | C <sub>7</sub> H <sub>5</sub> NO <sub>5</sub> | 96-97-9    | 5NSA         | 0.13±0.13 | 0.012±0.015 |

87  
88  
89  
90  
91  
92  
93

94  
95  
96

**Table S3** NH<sub>3</sub> concentrations in different regions of China

| Region | Location                 | Period                                 | Ammonia ( $\mu\text{g m}^{-3}$ ) | Reference                                                     |
|--------|--------------------------|----------------------------------------|----------------------------------|---------------------------------------------------------------|
| NCP    | Beijing                  | Summer of 2009                         | 29.4±11.9                        | Meng et al.(Meng et al., 2017)                                |
|        | Gucheng                  | Mar.2016-May.2017                      | 22.2±12.8                        | Kuang et al. (Kuang et al., 2020)                             |
|        |                          | May-Sep 2013                           | 27.5±42.8                        | Meng et al. (Meng et al., 2018)                               |
|        | Luancheng<br>Cangzhou    | Dec.2015-Feb.2016<br>Dec.2015-Feb.2016 | 17.2<br>22.2                     | Pan et al. (Pan et al., 2018)                                 |
| FWP    | Xi'an                    | Winter of 2016                         | 29±7.3                           | Wu et al. (Wu et al., 2020a)<br>Cao et al. (Cao et al., 2009) |
|        |                          | Summer of 2016                         | 38±9.4                           |                                                               |
|        |                          | 2006-2007                              | 12.9                             |                                                               |
|        | Weinan                   | Dec.2015-Feb.2016                      | 12.4                             | Pan et al. (Pan et al., 2018)                                 |
|        | Mt. Hua-MS<br>Mt. Hua-MF | Summer of 2020<br>Summer of 2020       | 3.1±1.9<br>27.3±51               | Wu et al. (Wu et al., 2022)                                   |
| YRD    | Shanghai                 | Autumn of 2019                         | 9.5                              | Wu et al. (Wu et al., 2023)                                   |
|        |                          | July-Dec 2013,<br>Mar-June 2014        | 9.4±6.9                          | Wang et al. (Wang et al., 2015)                               |
|        |                          | Dec.2019-Jan.2020                      | 9.3±4.0                          | Lv et al. (Lv et al., 2022)                                   |
|        | Nanjing<br>Taihu         | Dec.2015-Feb.2016<br>Dec.2015-Feb.2016 | 10.8<br>6.3                      | Pan et al. (Pan et al., 2018)                                 |
|        | Lin'an                   | Sep 2009-Dec 2010                      | 12.5±8.5                         | Meng et al. (Meng et al., 2014)                               |
| PRD    | Guangzhou                | Dec.2015-Feb.2016                      | 5.8                              | Pan et al. (Pan et al., 2018)                                 |
|        |                          | Oct-Nov 2004                           | 7.3±6.2                          | Hu et al. (Hu et al., 2008)                                   |
|        | Dinghushan<br>Maoming    | Dec.2015-Feb.2016<br>Dec.2015-Feb.2016 | 2.8<br>9.8                       | Pan et al. (Pan et al., 2018)                                 |
|        | Hongkong                 | Autumn 2000                            | 2.3±2.7                          | Yao et al. (Yao et al., 2006)                                 |
| TP     | Lhasa                    | Dec.2015-Feb.2016                      | 4.8                              | Pan et al. (Pan et al., 2018)                                 |
|        | Ali                      | Dec.2015-Feb.2016                      | 1.7                              | Pan et al. (Pan et al., 2018)                                 |

97 Note: In some cities, the NH<sub>3</sub> unit is ppb, which was converted by the formula of standard atmospheric  
98 pressure and normal temperature in this study. The abbreviations of NCP, FWP, YRD, PRD and TP indicate  
99 North China Plain, Fen-wei Plain, Yangtze River Delta, Pearl River Delta and Tibet Plateau, respectively.

100  
101  
102

**Table S4** MAE<sub>365</sub> of water-soluble BrC in PM<sub>2.5</sub> among different cities in the world.

| Region        | Location     | Year      | Season    | MAE <sub>365</sub>          | Reference                                     |
|---------------|--------------|-----------|-----------|-----------------------------|-----------------------------------------------|
| NCP,<br>China | Beijing      | 2011      | Winter    | 1.2±0.1                     | Cheng et al. (Cheng et al.,                   |
|               |              | 2010-2011 | Winter    | 1.26                        | Du et al.(Du et al., 2014)                    |
|               |              | 2010-2011 | Summer    | 0.51                        |                                               |
|               |              |           | Spring    | 1.4±0.18                    |                                               |
|               | Xingtai      | 2018-2019 | Summer    | 0.95±0.18                   | Li et al. (Li et al., 2023a)                  |
|               |              |           | Autumn    | 1.5±0.13                    |                                               |
|               |              |           | Winter    | 1.9±0.16                    |                                               |
|               | Jinan (TSP)  | 2016      | Spring    | 1.00±0.23                   | Wen et al. (Wen et al., 2021)                 |
|               | Zhangbei     | 2016      | Spring    | 1.32±0.34                   |                                               |
|               | Tianjin      | 2016–2017 | Winter    | 1.54±0.33                   | Deng et al.(Deng et al., 2022)                |
| Summer        |              |           | 0.84±0.22 |                             |                                               |
| FWP,<br>China | Xi'an        | 2016–2017 | Winter    | 1.2±0.06                    | Wu et al. (Wu et al., 2020b)                  |
|               |              |           | Summer    | 1.1±0.2                     |                                               |
|               | Licun        | 2017      | Winter    | 0.78 ± 0.96                 | Li et al. (Li et al., 2023b)                  |
|               |              |           | Winter    | 0.94±0.28                   | Li et al. (Li et al., 2020)                   |
|               |              |           | Summer    | 1.01±0.18                   |                                               |
|               |              |           | Summer    | 0.69±0.2                    |                                               |
| Mt. Hua-MS    | 2016         | Summer    | 0.67±0.21 | This study                  |                                               |
| Mt. Hua-MF    |              |           |           |                             |                                               |
| YRD,<br>China | Changzhou    | 2018      | Winter    | 0.74                        | Tao et al.(Tao et al., 2021)                  |
|               | Yangzhou     | 2015-2016 | Annual    | 0.75 ± 0.29                 | Chen et al.(Chen et al., 2018)                |
|               |              |           | Spring    | 0.69                        |                                               |
|               |              |           | Summer    | 0.51                        |                                               |
|               | Nanjing      | 2015-2016 | Autumn    | 0.55                        | Chen et al.(Chen et al., 2018)                |
|               |              |           | Winter    | 1.04                        |                                               |
|               | Shanghai     | 2018-2019 | Winter    | 1.18±0.42                   | Zhao et al. (Zhao et al.,                     |
| PRD,<br>China | Guangzhou    | 2012      | Winter    | 0.81                        | Liu et al.(Liu et al., 2018)                  |
|               |              | 2018      | Winter    | 1.0 ± 0.21                  | Zou et al.(Zou et al., 2023)                  |
|               |              | 2019      | Winter    | 0.34                        | Wang et al.(Wang et al., 2023)                |
|               |              | 2016      | Autumn    | 0.60±0.06                   | He et al. (He et al., 2023)                   |
|               | Taipei       | 2021      | Annual    | 0.86±0.60                   | Ting et al.(Ting et al., 2022)                |
| TP,<br>China  | Lulang       | 2015-2016 | Winter    | 0.75 ± 0.13                 | Zhu et al. (Zhu et al., 2018)                 |
|               | Lhasa        | 2013-2014 | Annual    | 0.74                        | Li et al. (Li et al., 2016)                   |
|               |              |           | Summer    | 0.27 ± 0.10                 |                                               |
|               | Southeast TP | 2013-2014 | Winter    | 0.86 ± 0.17                 | Wu et al. (Wu et al., 2020c)                  |
|               |              |           | Summer    | 0.38±0.16                   |                                               |
| Nam Co        | 2015         | Summer    | 0.38±0.16 | Zhang et al. (Zhang et al., |                                               |
| India         | Delhi        | 2016      | Spring    | 2.5                         | Dasari et al. (Dasari et al.,                 |
| Korea         | Seoul        | 2012-2013 | Winter    | 1.02                        | Kim et al. (Kim et al., 2016)                 |
|               |              |           | Summer    | 0.28                        |                                               |
| USA           | Los Angeles  | 2018-2019 | Winter    | 0.7±0.2                     | Soleimanian et al. (Soleimanian et al., 2020) |
|               |              |           | Summer    | 0.5±0.2                     |                                               |
|               | Yorkville    | 2010      | Winter    | 0.41                        | Hecobian et al. (Hecobian et                  |
| Switzerland   |              | 2013      | Summer    | 0.29                        | Mie et al. (Xie et al., 2019)                 |
|               |              |           | Winter    | 0.9                         |                                               |
| Greece        | Ioannina     | 2019      | Summer    | 0.28                        | Moschos et al. (Moschos et al., 2018)         |
|               |              |           | Summer    | 0.3 ± 0.1                   | Paraskevopoulou et al.                        |

105  
106  
107  
108  
109  
110  
111  
112  
113

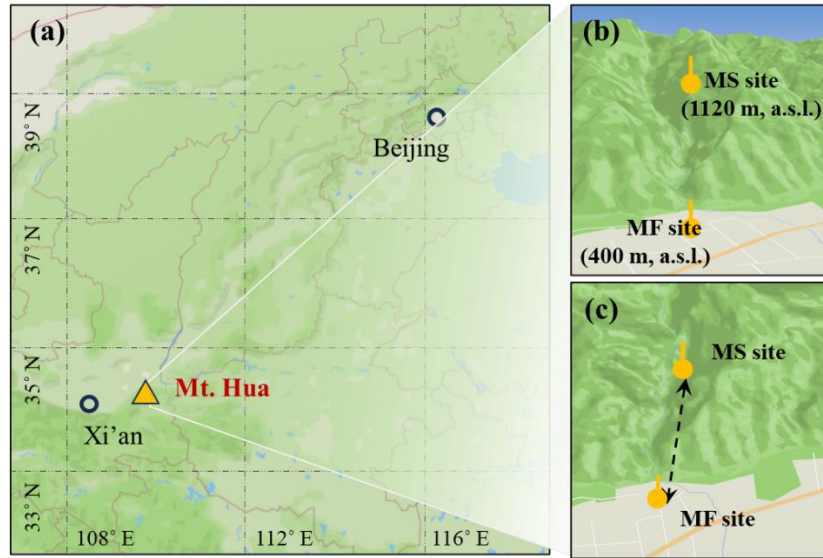

114  
115  
116  
117  
118  
119  
120

**Figure S1.** Locations of the sampling sites in China. **(a)** Topographic view, **(b)** vertical view and bird's-eye view **(c)** of Mt. Hua with the sampling sites marked. The maps are the reproductions from ©Mapbox (<https://account.mapbox.com/>, last access: 16 March 2024)

121  
122  
123

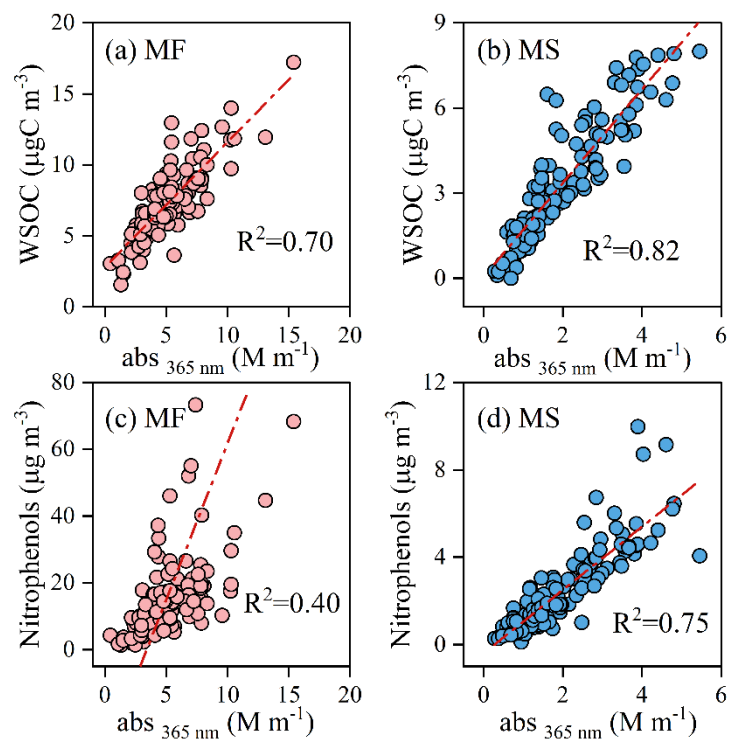

124  
125  
126  
127  
128  
129

**Figure S2.** Linear fit regression analysis for Abs<sub>λ=365 nm</sub> with WSOC and nitrophenols at MF and MS sites

130  
131  
132  
133

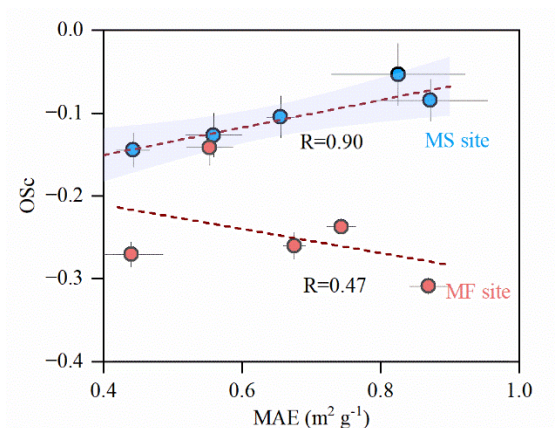

134  
135  
136  
137  
138  
139  
140

**Figure S3.** The correlativity between MAE<sub>365nm</sub> and OSc value at both sampling sites.

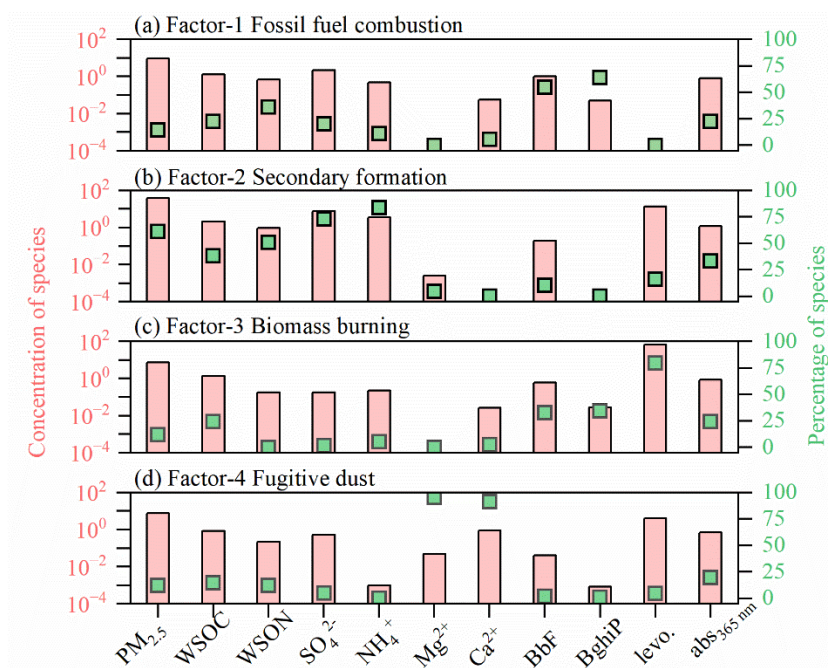

141  
142  
143  
144  
145

**Figure S4.** Source apportionment for light absorption of daytime water-soluble BrC (abs<sub>365 nm</sub>) of all the daytime samples collected during the whole campaign.



146  
147  
148  
149  
150  
151

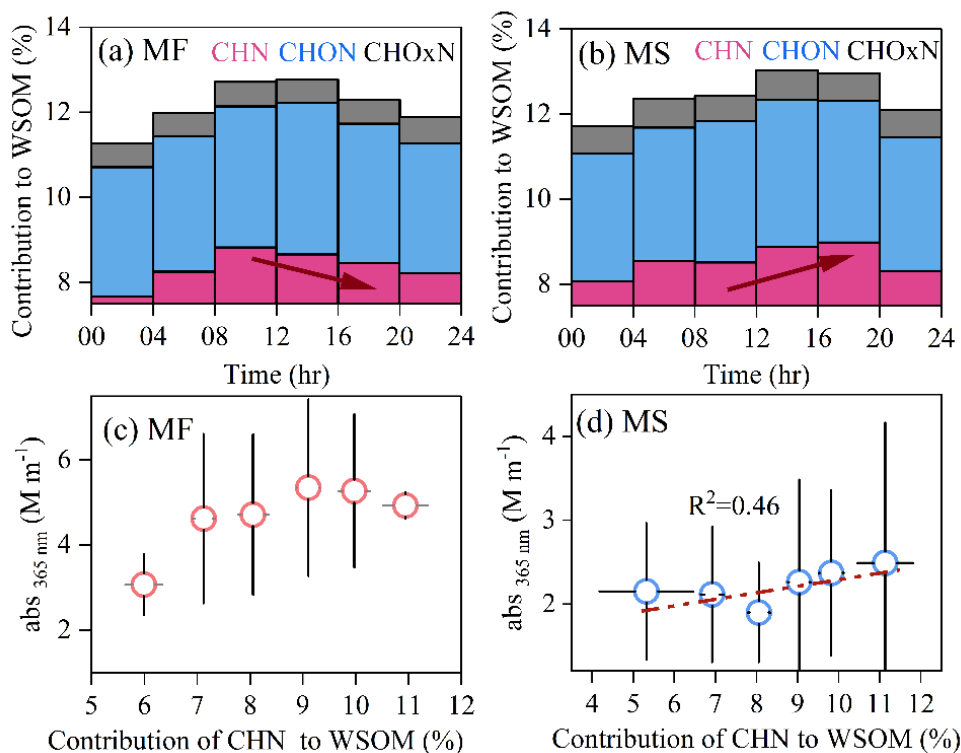

152  
153  
154  
155  
156  
157  
158  
159  
160

**Figure S5.** (a) and (b) Diurnal variations in relative contributions of nitrogen-containing organic fragments to WSOM at MF and MS sites, respectively. (c and d) The dependence of light absorption of WSOC ( $\text{Abs}_{\lambda=365\text{ nm}}$ ) on the relative contributions of CHN fragments to WSOM at the two sampling sites.

161  
162  
163  
164  
165  
166  
167

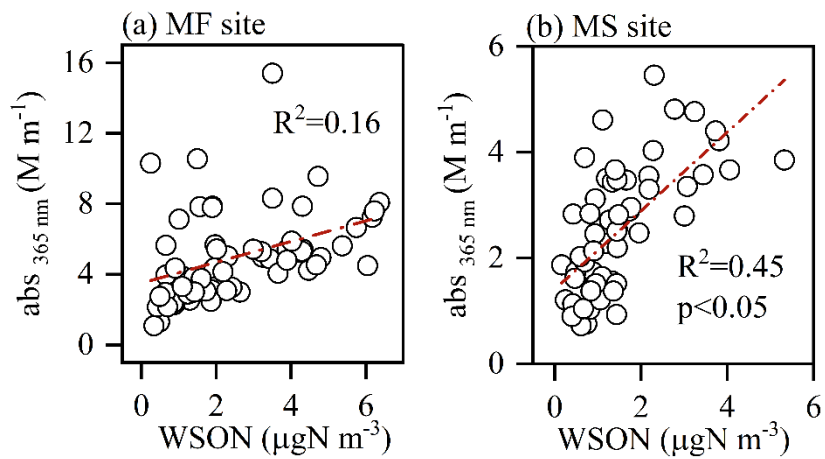

168  
169  
170

**Figure S6** Linear fit regression analysis for  $\text{Abs}_{\lambda=365 \text{ nm}}$  and WSON of the daytime samples at two sites

171  
172  
173  
174  
175  
176

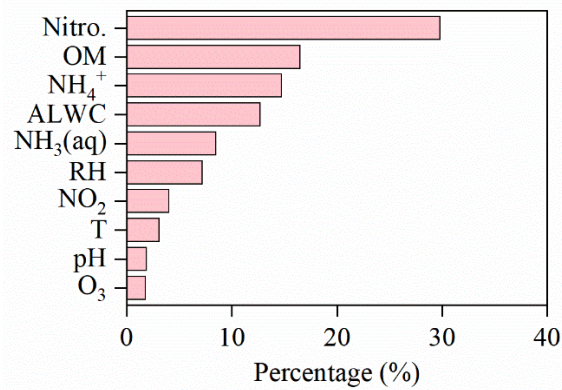

177  
178  
179

**Figure S7** Random forest analysis for daytime WSON of the PM<sub>2.5</sub> at MF site.

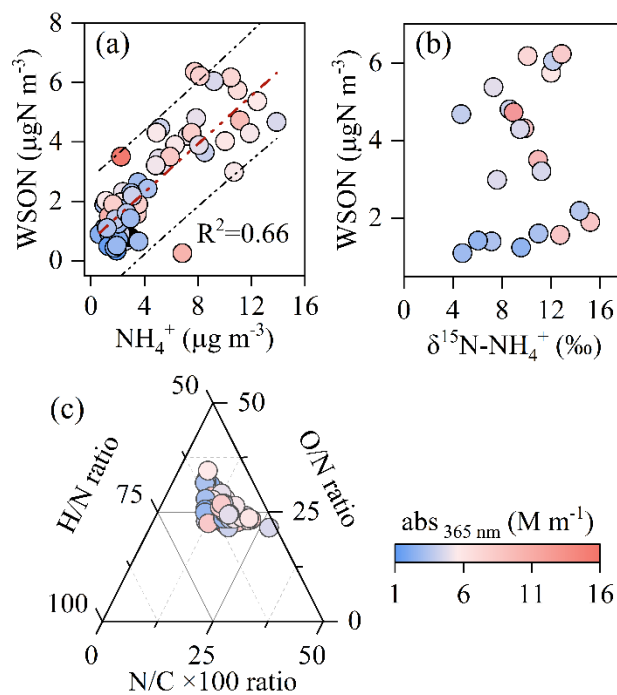

180  
181  
182  
183  
184

**Figure S8** Impacts on WSON formation at MF site. Linear fit regressions for WSON with  $\text{NH}_4^+$ + $\text{NH}_3(\text{aq})$  (a) and  $\delta^{15}\text{N-NH}_4^+$  (b) at MF site and triangular chart for the elemental ratios of N/C, H/N and O/N of WSOC at MF site (c).

185  
186  
187  
188

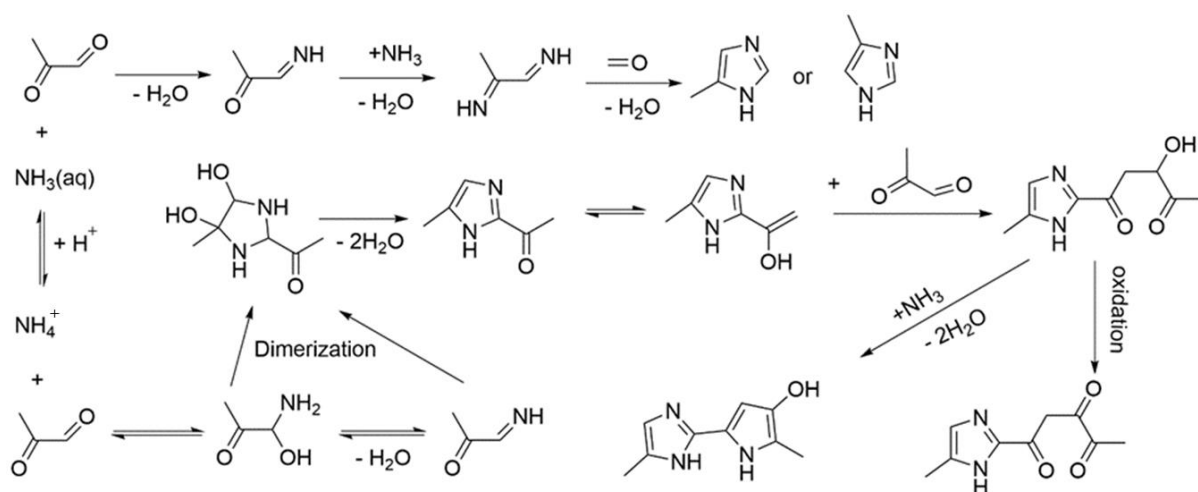

189  
190  
191  
192

**Figure S9** Simple reaction paths for imidazoles or N-heterocycles (Modified from Aiona et al. (2017) and Jang et al. (2013))

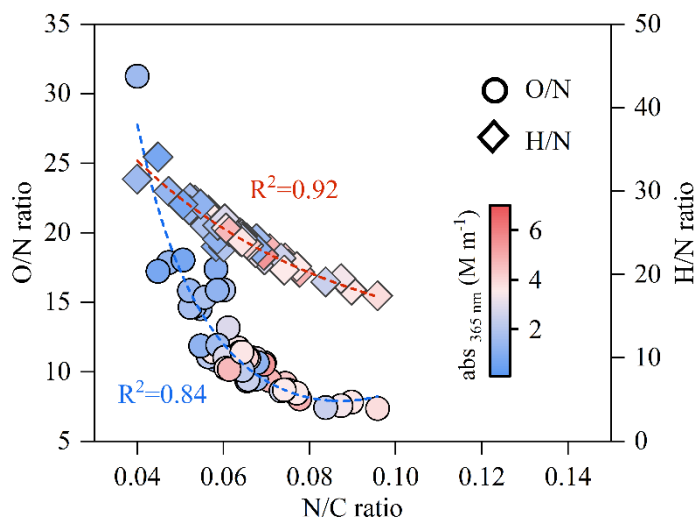

194

195

**Figure S10** Elemental composition of daytime WSOC at MS site.

196

197

198

199

200

201 **References**

- 202 Aiona, P. K., Lee, H. J., Leslie, R., Lin, P., Laskin, A., Laskin, J., and Nizkorodov, S. A.: Photochemistry of  
203 Products of the Aqueous Reaction of Methylglyoxal with Ammonium Sulfate, *ACS Earth Space Chem.*, 1,  
204 522-532, 10.1021/acsearthspacechem.7b00075, 2017.
- 205 Cao, J.-J., Zhang, T., Chow, J. C., Watson, J. G., Wu, F., and Li, H.: Characterization of Atmospheric Ammonia  
206 over Xi'an, China, *Aerosol Air Qual. Res.*, 9, 277-289, 2009.
- 207 Chen, Y., Ge, X., Chen, H., Xie, X., Chen, Y., Wang, J., Ye, Z., Bao, M., Zhang, Y., and Chen, M.: Seasonal light  
208 absorption properties of water-soluble brown carbon in atmospheric fine particles in Nanjing, China, *Atmos.*  
209 *Environ.*, 187, 230-240, 10.1016/j.atmosenv.2018.06.002, 2018.
- 210 Chen, Y., Xie, X., Shi, Z., Li, Y., Gai, X., Wang, J., Li, H., Wu, Y., Zhao, X., Chen, M., and Ge, X.: Brown carbon  
211 in atmospheric fine particles in Yangzhou, China: Light absorption properties and source apportionment,  
212 *Atmos. Res.*, 244, 10.1016/j.atmosres.2020.105028, 2020.
- 213 Cheng, Y., He, K.-b., Du, Z.-y., Engling, G., Liu, J.-m., Ma, Y.-l., Zheng, M., and Weber, R. J.: The characteristics  
214 of brown carbon aerosol during winter in Beijing, *Atmos. Environ.*, 127, 355-364,  
215 10.1016/j.atmosenv.2015.12.035, 2016.
- 216 Dasari, S., Andersson, A., Bikkina, S., Holmstrand, H., Budhavant, K., Satheesh, S., Asmi, E., Kesti, J., Backman,  
217 J., Salam, A., Bisht, D. S., Tiwari, S., Hameed, Z., and Gustafsson, O.: Photochemical degradation affects the  
218 light absorption of water-soluble brown carbon in the South Asian outflow, *Science Advances*, 5,  
219 10.1126/sciadv.aau8066, 2019.
- 220 Deng, J., Ma, H., Wang, X., Zhong, S., Zhang, Z., Zhu, J., Fan, Y., Hu, W., Wu, L., Li, X., Ren, L., Pavuluri, C. M.,  
221 Pan, X., Sun, Y., Wang, Z., Kawamura, K., and Fu, P.: Measurement report: Optical properties and sources of  
222 water-soluble brown carbon in Tianjin, North China insights from organic molecular compositions, *Atmos.*  
223 *Chem. Phys.*, 22, 6449-6470, 10.5194/acp-22-6449-2022, 2022.
- 224 Du, Z., He, K., Cheng, Y., Duan, F., Ma, Y., Liu, J., Zhang, X., Zheng, M., and Weber, R.: A yearlong study of  
225 water-soluble organic carbon in Beijing II: Light absorption properties, *Atmospheric Environment*, 89, 235-  
226 241, <http://dx.doi.org/10.1016/j.atmosenv.2014.02.022>, 2014.
- 227 He, T., Wu, Y., Wang, D., Cai, J., Song, J., Yu, Z., Zeng, X., and Peng, P. a.: Molecular compositions and optical  
228 properties of water-soluble brown carbon during the autumn and winter in Guangzhou, China, *Atmos.*  
229 *Environ.*, 296, 10.1016/j.atmosenv.2022.119573, 2023.
- 230 Hecobian, A., Zhang, X., Zheng, M., Frank, N., Edgerton, E. S., and Weber, R. J.: Water-Soluble Organic Aerosol  
231 material and the light-absorption characteristics of aqueous extracts measured over the Southeastern United  
232 States, *Atmos. Chem. Phys.*, 10, 5965-5977, 10.5194/acp-10-5965-2010, 2010.
- 233 Hu, M., Wu, Z., Slanina, J., Lin, P., Liu, S., and Zeng, L.: Acidic gases, ammonia and water-soluble ions in PM2.5  
234 at a coastal site in the Pearl River Delta, China, *Atmos. Environ.*, 42, 6310-6320,  
235 10.1016/j.atmosenv.2008.02.015, 2008.
- 236 Jang, H. W., Jiang, Y., Hengel, M., and Shibamoto, T.: Formation of 4(5)-Methylimidazole and Its Precursors,  $\alpha$ -  
237 Dicarbonyl Compounds, in *Maillard Model Systems*, *J. Agric. Food. Chem.*, 61, 6865-6872,  
238 10.1021/jf401958w, 2013.
- 239 Kim, H., Kim, J. Y., Jin, H. C., Lee, J. Y., and Lee, S. P.: Seasonal variations in the light-absorbing properties of  
240 water-soluble and insoluble organic aerosols in Seoul, Korea, *Atmos. Environ.*, 129, 234-242,  
241 10.1016/j.atmosenv.2016.01.042, 2016.
- 242 Kuang, Y., Xu, W., Lin, W., Meng, Z., Zhao, H., Ren, S., Zhang, G., Liang, L., and Xu, X.: Explosive morning  
243 growth phenomena of NH<sub>3</sub> on the North China Plain: Causes and potential impacts on aerosol formation,

244 Environ. Pollut., 257, 10.1016/j.envpol.2019.113621, 2020.

245 Li, C., Chen, P., Kang, S., Yan, F., Hu, Z., Qu, B., and Sillanpaa, M.: Concentrations and light absorption  
 246 characteristics of carbonaceous aerosol in PM<sub>2.5</sub> and PM<sub>10</sub> of Lhasa city, the Tibetan Plateau, Atmos.  
 247 Environ., 127, 340-346, 10.1016/j.atmosenv.2015.12.059, 2016.

248 Li, D., Wu, C., Zhang, S., Lei, Y., Lv, S., Du, W., Liu, S., Zhang, F., Liu, X., Liu, L., Meng, J., Wang, Y., Gao, J.,  
 249 and Wang, G.: Significant coal combustion contribution to water-soluble brown carbon during winter in  
 250 Xingtai, China: Optical properties and sources, J. Environ. Sci., 124, 892-900, 10.1016/j.jes.2022.02.026,  
 251 2023a.

252 Li, J., Zhang, Q., Wang, G., Li, J., Wu, C., Liu, L., Wang, J., Jiang, W., Li, L., Ho, K. F., and Cao, J.: Optical  
 253 properties and molecular compositions of water-soluble and water-insoluble brown carbon (BrC) aerosols in  
 254 northwest China, Atmos. Chem. Phys., 20, 4889-4904, 10.5194/acp-20-4889-2020, 2020.

255 Li, X., Yu, F., Song, Y., Zhang, C., Yan, F., Hu, Z., Lei, Y., Tripathee, L., Zhang, R., Guo, J., Wang, Y., Chen, Q.,  
 256 Liu, L., Cao, J., and Wang, Q.: Water-soluble brown carbon in PM<sub>2.5</sub> at two typical sites in Guanzhong Basin:  
 257 Optical properties, sources, and implications, Atmos. Res., 281, 10.1016/j.atmosres.2022.106499, 2023b.

258 Liu, J., Mo, Y., Ding, P., Li, J., Shen, C., and Zhang, G.: Dual carbon isotopes (C-14 and C-13) and optical  
 259 properties of WSOC and HULIS-C during winter in Guangzhou, China, Sci. Total Environ., 633, 1571-1578,  
 260 10.1016/j.scitotenv.2018.03.293, 2018.

261 Lv, S., Wang, F., Wu, C., Chen, Y., Liu, S., Zhang, S., Li, D., Du, W., Zhang, F., Wang, H., Huang, C., Fu, Q.,  
 262 Duan, Y., and Wang, G.: Gas-to-Aerosol Phase Partitioning of Atmospheric Water-Soluble Organic  
 263 Compounds at a Rural Site in China: An Enhancing Effect of NH<sub>3</sub> on SOA Formation, Environ. Sci. Technol.,  
 264 56, 3915-3924, 10.1021/acs.est.1c06855, 2022.

265 Meng, Z., Lin, W., Zhang, R., Han, Z., and Jia, X.: Summertime ambient ammonia and its effects on ammonium  
 266 aerosol in urban Beijing, China, Sci. Total Environ., 579, 1521-1530, 10.1016/j.scitotenv.2016.11.159, 2017.

267 Meng, Z., Zhang, R., Lin, W., Jia, X., Yu, X., Yu, X., and Wang, G.: Seasonal Variation of Ammonia and  
 268 Ammonium Aerosol at a Background Station in the Yangtze River Delta Region, China, Aerosol Air Qual.  
 269 Res., 14, 756-766, 10.4209/aaqr.2013.02.0046, 2014.

270 Meng, Z., Xu, X., Lin, W., Ge, B., Xie, Y., Song, B., Jia, S., Zhang, R., Peng, W., Wang, Y., Cheng, H., Yang, W.,  
 271 and Zhao, H.: Role of ambient ammonia in particulate ammonium formation at a rural site in the North China  
 272 Plain, Atmos. Chem. Phys., 18, 167-184, 10.5194/acp-18-167-2018, 2018.

273 Moschos, V., Kumar, N. K., Daellenbach, K. R., Baltensperger, U., Prevot, A. S. H., and El Haddad, I.: Source  
 274 Apportionment of Brown Carbon Absorption by Coupling Ultraviolet-Visible Spectroscopy with Aerosol  
 275 Mass Spectrometry, Environmental Science & Technology Letters, 5, 302-+, 10.1021/acs.estlett.8b00118,  
 276 2018.

277 Pan, Y., Tian, S., Zhao, Y., Zhang, L., Zhu, X., Gao, J., Huang, W., Zhou, Y., Song, Y., Zhang, Q., and Wang, Y.:  
 278 Identifying Ammonia Hotspots in China Using a National Observation Network, Environ. Sci. Technol., 52,  
 279 3926-3934, 10.1021/acs.est.7b05235, 2018.

280 Paraskevopoulou, D., Kaskaoutis, D. G., Grivas, G., Bikkina, S., Tsagkaraki, M., Vrettou, I. M., Tavernaraki, K.,  
 281 Papoutsidaki, K., Stavroulas, I., Liakakou, E., Bougiatioti, A., Oikonomou, K., Gerasopoulos, E., and  
 282 Mihalopoulos, N.: Brown carbon absorption and radiative effects under intense residential wood burning  
 283 conditions in Southeastern Europe: New insights into the abundance and absorptivity of methanol-soluble  
 284 organic aerosols, Sci. Total Environ., 860, 10.1016/j.scitotenv.2022.160434, 2023.

285 Soleimani, E., Mousavi, A., Taghvaei, S., Shafer, M. M., and Sioutas, C.: Impact of secondary and primary  
 286 particulate matter (PM) sources on the enhanced light absorption by brown carbon (BrC) particles in central  
 287 Los Angeles, Sci. Total Environ., 705, 10.1016/j.scitotenv.2019.135902, 2020.

288 Tao, Y., Sun, N., Li, X., Zhao, Z., Ma, S., Huang, H., Ye, Z., and Ge, X.: Chemical and Optical Characteristics and  
289 Sources of PM<sub>2.5</sub> Humic-Like Substances at Industrial and Suburban Sites in Changzhou, China,  
290 Atmosphere, 12, 10.3390/atmos12020276, 2021.

291 Ting, Y.-C., Ko, Y.-R., Huang, C.-H., Cheng, Y.-H., and Huang, C.-H.: Optical properties and potential sources of  
292 water-soluble and methanol-soluble organic aerosols in Taipei, Taiwan, Atmos. Environ., 290,  
293 10.1016/j.atmosenv.2022.119364, 2022.

294 Wang, D., Shen, Z., Zhang, Q., Lei, Y., Zhang, T., Huang, S., Sun, J., Xu, H., and Cao, J.: Winter brown carbon  
295 over six of China's megacities: light absorption, molecular characterization, and improved source  
296 apportionment revealed by multilayer perceptron neural network, Atmos. Chem. Phys., 22, 14893-14904,  
297 10.5194/acp-22-14893-2022, 2022.

298 Wang, S., Nan, J., Shi, C., Fu, Q., Gao, S., Wang, D., Cui, H., Saiz-Lopez, A., and Zhou, B.: Atmospheric  
299 ammonia and its impacts on regional air quality over the megacity of Shanghai, China, Sci. Rep., 5,  
300 10.1038/srep15842, 2015.

301 Wen, H., Zhou, Y., Xu, X., Wang, T., Chen, Q., Chen, Q., Li, W., Wang, Z., Huang, Z., Zhou, T., Shi, J., Bi, J., Ji,  
302 M., and Wang, X.: Water-soluble brown carbon in atmospheric aerosols along the transport pathway of Asian  
303 dust: Optical properties, chemical compositions, and potential sources, Sci. Total Environ., 789,  
304 10.1016/j.scitotenv.2021.147971, 2021.

305 Wu, C., Cao, C., Li, J., Lv, S., Li, J., Liu, X., Zhang, S., Liu, S., Zhang, F., Meng, J., and Wang, G.: Different  
306 physicochemical behaviors of nitrate and ammonium during transport: a case study on Mt. Hua, China, Atmos.  
307 Chem. Phys., 22, 15621-15635, 10.5194/acp-22-15621-2022, 2022.

308 Wu, C., Wang, G., Li, J., Li, J., Cao, C., Ge, S., Xie, Y., Chen, J., Liu, S., Du, W., Zhao, Z., and Cao, F.: Non-  
309 agricultural sources dominate the atmospheric NH<sub>3</sub> in Xi'an, a megacity in the semi-arid region of China, Sci.  
310 Total Environ., 722, 137756, 10.1016/j.scitotenv.2020.137756, 2020a.

311 Wu, C., Lv, S., Wang, F., Liu, X., Li, J., Liu, L., Zhang, S., Du, W., Liu, S., Zhang, F., Li, J., Meng, J., and Wang,  
312 G.: Ammonia in urban atmosphere can be substantially reduced by vehicle emission control: A case study in  
313 Shanghai, China, J. Environ. Sci., 126, 754-760, 10.1016/j.jes.2022.04.043, 2023.

314 Wu, C., Wang, G., Li, J., Li, J., Cao, C., Ge, S., Xie, Y., Chen, J., Li, X., Xue, G., Wang, X., Zhao, Z., and Cao, F.:  
315 The characteristics of atmospheric brown carbon in Xi'an, inland China: sources, size distributions and optical  
316 properties, Atmos. Chem. Phys., 20, 2017-2030, 10.5194/acp-20-2017-2020, 2020b.

317 Wu, G., Wan, X., Ram, K., Li, P., Liu, B., Yin, Y., Fu, P., Loewen, M., Gao, S., Kang, S., Kawamura, K., Wang, Y.,  
318 and Cong, Z.: Light absorption, fluorescence properties and sources of brown carbon aerosols in the  
319 Southeast Tibetan Plateau, Environ. Pollut., 257, 10.1016/j.envpol.2019.113616, 2020c.

320 Xie, M., Chen, X., Holder, A. L., Hays, M. D., Lewandowski, M., Offenberg, J. H., Kleindienst, T. E., Jaoui, M.,  
321 and Hannigan, M. P.: Light absorption of organic carbon and its sources at a southeastern US location in  
322 summer, Environ. Pollut., 244, 38-46, 10.1016/j.envpol.2018.09.125, 2019.

323 Yao, X., Ling, T. Y., Fang, M., and Chan, C. K.: Comparison of thermodynamic predictions for in situ pH in  
324 PM<sub>2.5</sub>, Atmos. Environ., 40, 2835-2844, 10.1016/j.atmosenv.2006.01.006, 2006.

325 Zhang, Y., Xu, J., Shi, J., Xie, C., Ge, X., Wang, J., Kang, S., and Zhang, Q.: Light absorption by water-soluble  
326 organic carbon in atmospheric fine particles in the central Tibetan Plateau, Environmental Science and  
327 Pollution Research, 24, 21386-21397, 10.1007/s11356-017-9688-8, 2017.

328 Zhao, Y., Wu, C., Wang, Y.-q., Chen, Y.-b., Lu, S.-j., Wang, F.-l., Du, W., Liu, S.-j., Ding, Z.-j., and Wang, G.-h.:  
329 Pollution Characteristics and Sources of Wintertime Atmospheric Brown Carbon at a Background Site of the  
330 Yangtze River Delta Region in China, Huanjing Kexue, 42, 3127-3135, 10.13227/j.hjlx.202012002, 2021.

331 Zhu, C.-S., Cao, J.-J., Huang, R.-J., Shen, Z.-X., Wang, Q.-Y., and Zhang, N.-N.: Light absorption properties of



332 brown carbon over the southeastern Tibetan Plateau, *Sci. Total Environ.*, 625, 246-251,  
333 10.1016/j.scitotenv.2017.12.183, 2018.

334 Zou, C., Cao, T., Li, M., Song, J., Jiang, B., Jia, W., Li, J., Ding, X., Yu, Z., Zhang, G., and Peng, P. a.:  
335 Measurement report: Changes in light absorption and molecular composition of water-soluble humic-like  
336 substances during a winter haze bloom-decay process in Guangzhou, China, *Atmos. Chem. Phys.*, 23, 963-979,  
337 10.5194/acp-23-963-2023, 2023.

338
